# Supplementary material for: Health-related quality of life and prevalence of six chronic diseases in homeless and housed people: a cross-sectional study in London and Birmingham, England
Source: PubMed Central journal article supplement (PMC6501971; doi:10.1136/bmjopen-2018-025192), 2019-04-24
Supplement: bmjopen-2018-025192supp001.pdf [file bmjopen-2018-025192supp001.pdf]

## **Supplementary information**

1. Table S1: prevalence of long term conditions by age group
2. Figure. Health-related quality of life in participants with one or more long-term condition
3. Table S2: Sensitivity analysis excluding Health Survey for England data 2006 and 2008
4. Table S3: QALY scores, visual-analogue method
5. Table S4: QALY scores, time trade-off method

**1. Table S1. prevalence of long-term condition by age group: cases/sample size (prevalence; 95% confidence intervals). Stroke is excluded to avoid publication of small numbers**

| Condition      | Age group | Find & Treat (homeless)  | Health Survey for England (housed) |
|----------------|-----------|--------------------------|------------------------------------|
| Asthma         | 16-34     | 88/504 (17.5; 14.3-21.1) | 300/5040 (6.0; 5.3-6.7)            |
|                | 35-44     | 76/373 (20.4; 16.5-24.9) | 232/3740 (6.2; 5.5-7.0)            |
|                | 45-54     | 52/315 (16.5; 12.7-21.2) | 164/3150 (5.2; 4.5-6.1)            |
|                | 55-64     | 28/143 (19.6; 13.6-27.2) | 60/1430 (4.2; 3.2-5.4)             |
|                |           | p=0.542                  | p=0.020                            |
| COPD           | 16-34     | 48/504 (9.5; 7.2-12.5)   | 23/5040 (0.5; 0.3-0.7)             |
|                | 35-44     | 50/374 (13.4; 10.2-17.3) | 36/3740 (1.0; 0.7-1.3)             |
|                | 45-54     | 50/315 (15.9; 12.1-20.5) | 60/3150 (1.9; 1.5-2.5)             |
|                | 55-64     | 39/143 (27.3; 20.3-35.5) | 61/1430 (4.3; 3.3-5.5)             |
|                |           | p<0.001                  | p<0.001                            |
| Epilepsy       | 16-34     | 23/504 (4.6; 3.0-6.9)    | 38/5040 (0.8; 0.5-1.0)             |
|                | 35-44     | 26/374 (7.0; 4.7-10.1)   | 30/3740 (0.8; 0.6-1.2)             |
|                | 45-54     | 23/315 (7.3; 4.8-10.9)   | 30/3150 (1.0; 0.7-1.4)             |
|                | 55-64     | 8/143 (5.6; 2.6-11.1)    | 10/1430 (0.7; 0.4-1.3)             |
|                |           | p=0.329                  | p=0.749                            |
| Heart problems | 16-34     | 16/504 (3.2; 1.9-5.2)    | 24/5040 (0.5; 0.3-0.7)             |
|                | 35-44     | 25/374 (6.7; 4.5-9.8)    | 42/3740 (1.1; 0.8-1.5)             |
|                | 45-54     | 36/315 (11.4; 8.2-15.6)  | 107/3150 (3.4; 2.8-4.1)            |
|                | 55-64     | 26/143 (18.2; 12.4-25.7) | 93/1430 (6.5; 5.3-7.9)             |
|                |           | p<0.001                  | p<0.001                            |
| Diabetes       | 16-34     | 8/504 (1.6; 0.7-3.2)     | 42/5040 (0.8; 0.6-1.1)             |
|                | 35-44     | 14/374 (3.7; 2.1-6.3)    | 88/3740 (2.4; 1.9-2.9)             |
|                | 45-54     | 22/315 (7.0; 4.5-10.5)   | 172/3150 (5.5; 4.7-6.3)            |
|                | 55-64     | 11/143 (7.7; 4.1-13.7)   | 129/1430 (9.0; 7.6-10.7)           |
|                |           | p<0.001                  | p<0.001                            |

Age groups 16-24 and 25-34 have been merged to avoid publication of small numbers. p-values are based on chi-square tests.

**2. Figure S1. Odds ratios of reported problems in EQ-5D-3L domains (some and severe problems grouped), by deprivation and presence of any long-term conditions, with 95% confidence intervals**

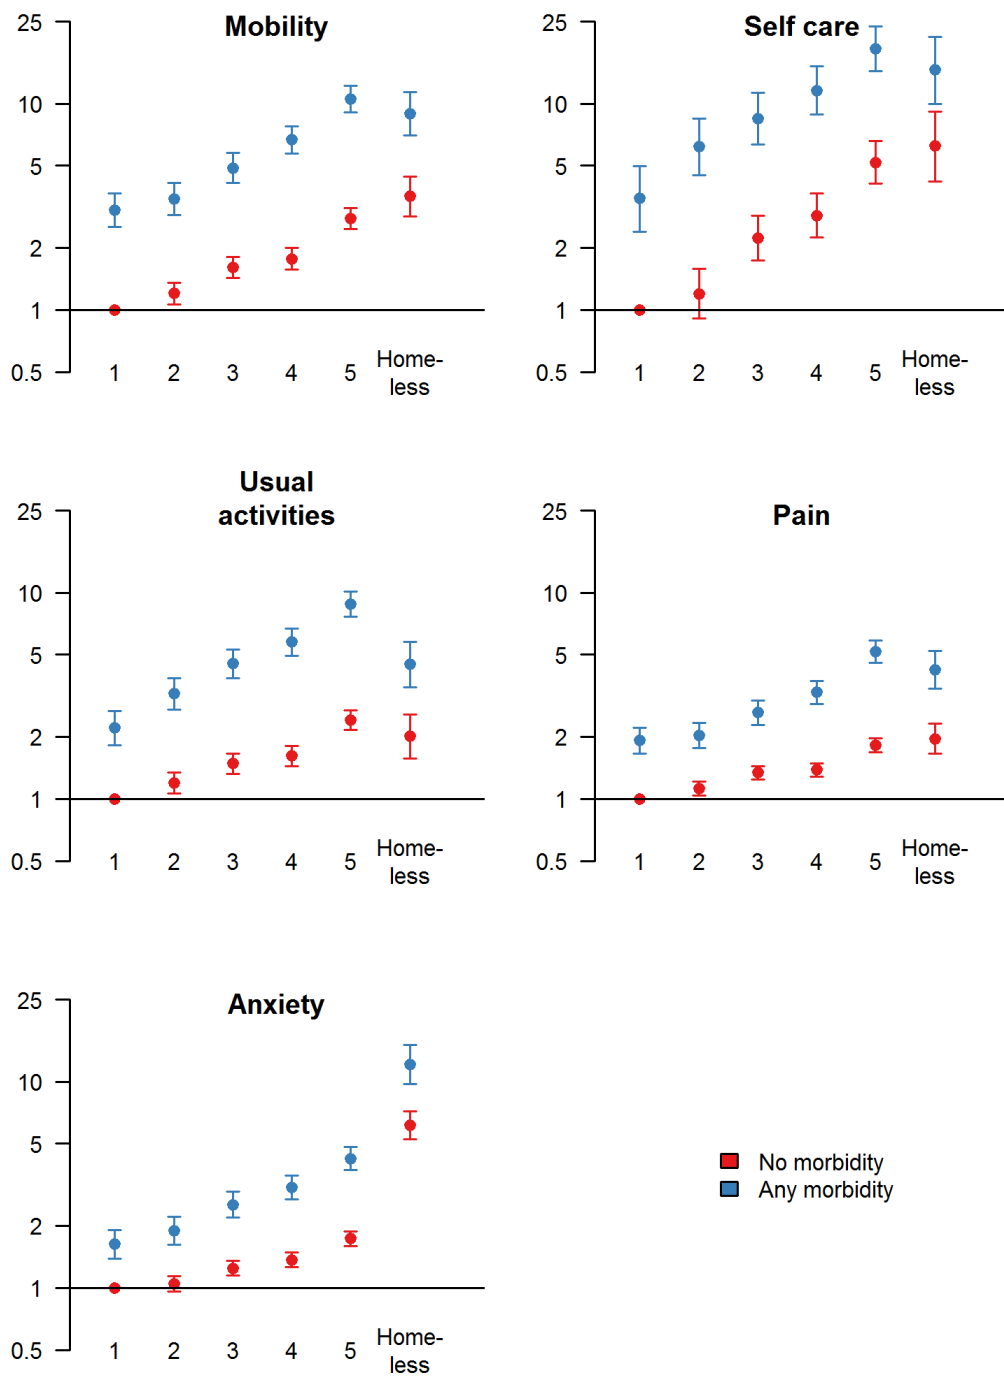

x-axis show deprivation groups (1 = least deprived quintile of Index of Multiple Deprivation; 5 = most deprived quintile of Index of Multiple deprivation). Y-axis shows odds ratios, with least deprived group with no morbidity as the reference group.

**3. Table S2: Sensitivity analysis excluding Health Survey for England data 2006 and 2008: prevalence ratio comparing homeless participants to the least deprived housed quintile**

|                             |                  | <b>Original analysis</b> | <b>Excluding HSE data from 2006 and 2008</b> |
|-----------------------------|------------------|--------------------------|----------------------------------------------|
| <b>Long-term conditions</b> | Asthma           | 3.3 (2.8-4.1)            | 3.7 (2.8-4.7)                                |
|                             | Breathing        | 12.9 (8.8-19.0)          | 16.6 (9.3-29.5)                              |
|                             | Epilepsy         | 10.7 (6.2-18.4)          | 12.1 (5.6-26.2)                              |
|                             | Heart problems   | 5.1 (3.6-7.4)            | 6.8 (4.1-11.5)                               |
|                             | Stroke           | 6.9 (3.0-15.9)           | 8.5 (2.6-28.2)                               |
|                             | Diabetes         | 1.4 (1.0-2.0)            | 1.6 (1.1-2.5)                                |
| <b>EQ-5D problems</b>       | Mobility         | 3.5 (2.9-4.3)            | 3.3 (2.6-4.2)                                |
|                             | Self-care        | 6.1 (4.1-9.1)            | 7.6 (4.3-13.5)                               |
|                             | Usual activities | 2.2 (1.8-2.7)            | 2.0 (1.6-2.5)                                |
|                             | Pain             | 1.7 (1.5-1.9)            | 1.6 (1.4-1.8)                                |
|                             | Anxiety          | 3.8 (3.4-4.2)            | 3.2 (2.8-3.7)                                |

#### 4. Table S3: QALY scores, visual analogue method

| Group    | Sex    | Age   | N     | Missing | Mean  |       |          |          | Quantiles |       |       |       |       |
|----------|--------|-------|-------|---------|-------|-------|----------|----------|-----------|-------|-------|-------|-------|
|          |        |       |       |         | Mean  | sd    | 0.025 CI | 0.975 CI | 0%        | 25%   | 50%   | 75%   | 100%  |
| Homeless | Female | 16-24 | 46    | 6       | 0.736 | 0.207 | 0.670    | 0.803    | 0.351     | 0.506 | 0.761 | 1.000 | 1.000 |
|          |        | 25-34 | 69    | 5       | 0.687 | 0.240 | 0.627    | 0.747    | 0.233     | 0.505 | 0.725 | 1.000 | 1.000 |
|          |        | 35-44 | 69    | 7       | 0.634 | 0.260 | 0.568    | 0.700    | 0.196     | 0.435 | 0.694 | 0.782 | 1.000 |
|          |        | 45-54 | 52    | 8       | 0.614 | 0.274 | 0.531    | 0.698    | -0.073    | 0.432 | 0.675 | 0.782 | 1.000 |
|          |        | 55-64 | 13    | 3       | 0.593 | 0.259 | 0.407    | 0.779    | 0.227     | 0.350 | 0.669 | 0.769 | 1.000 |
|          | Male   | 16-24 | 94    | 10      | 0.816 | 0.209 | 0.771    | 0.862    | 0.270     | 0.698 | 0.798 | 1.000 | 1.000 |
|          |        | 25-34 | 295   | 33      | 0.778 | 0.227 | 0.750    | 0.806    | 0.140     | 0.673 | 0.782 | 1.000 | 1.000 |
|          |        | 35-44 | 305   | 32      | 0.720 | 0.240 | 0.691    | 0.748    | 0.038     | 0.506 | 0.761 | 1.000 | 1.000 |
|          |        | 45-54 | 263   | 26      | 0.701 | 0.264 | 0.667    | 0.734    | 0.138     | 0.503 | 0.761 | 1.000 | 1.000 |
|          |        | 55-64 | 130   | 12      | 0.704 | 0.270 | 0.655    | 0.753    | -0.023    | 0.506 | 0.761 | 1.000 | 1.000 |
| Housed   | Female | 16-24 | 460   | 45      | 0.914 | 0.147 | 0.900    | 0.928    | 0.151     | 0.782 | 1.000 | 1.000 | 1.000 |
|          |        | 25-34 | 690   | 63      | 0.908 | 0.155 | 0.896    | 0.921    | 0.140     | 0.782 | 1.000 | 1.000 | 1.000 |
|          |        | 35-44 | 690   | 50      | 0.877 | 0.180 | 0.863    | 0.891    | 0.090     | 0.761 | 1.000 | 1.000 | 1.000 |
|          |        | 45-54 | 520   | 56      | 0.819 | 0.217 | 0.800    | 0.839    | -0.073    | 0.698 | 0.782 | 1.000 | 1.000 |
|          |        | 55-64 | 130   | 4       | 0.811 | 0.222 | 0.772    | 0.851    | 0.029     | 0.692 | 0.782 | 1.000 | 1.000 |
|          | Male   | 16-24 | 940   | 112     | 0.937 | 0.132 | 0.928    | 0.946    | 0.151     | 1.000 | 1.000 | 1.000 | 1.000 |
|          |        | 25-34 | 2950  | 321     | 0.921 | 0.146 | 0.915    | 0.926    | -0.021    | 0.782 | 1.000 | 1.000 | 1.000 |
|          |        | 35-44 | 3050  | 317     | 0.889 | 0.175 | 0.882    | 0.895    | 0.038     | 0.761 | 1.000 | 1.000 | 1.000 |
|          |        | 45-54 | 2630  | 256     | 0.862 | 0.197 | 0.854    | 0.870    | -0.073    | 0.761 | 1.000 | 1.000 | 1.000 |
|          |        | 55-64 | 1300  | 129     | 0.815 | 0.226 | 0.802    | 0.828    | 0.075     | 0.698 | 0.782 | 1.000 | 1.000 |
| Homeless | Female | All   | 249   | 29      | 0.662 | 0.250 | 0.629    | 0.696    | -0.073    | 0.503 | 0.698 | 0.782 | 1.000 |
|          | Male   | All   | 1087  | 113     | 0.737 | 0.247 | 0.722    | 0.753    | -0.023    | 0.506 | 0.778 | 1.000 | 1.000 |
| Housed   | Female | All   | 2490  | 218     | 0.877 | 0.183 | 0.870    | 0.885    | -0.073    | 0.761 | 1.000 | 1.000 | 1.000 |
|          | Male   | All   | 10870 | 1135    | 0.886 | 0.181 | 0.882    | 0.890    | -0.073    | 0.761 | 1.000 | 1.000 | 1.000 |
| Homeless | Both   | 16-24 | 140   | 16      | 0.791 | 0.211 | 0.753    | 0.828    | 0.270     | 0.677 | 0.782 | 1.000 | 1.000 |
|          |        | 25-34 | 364   | 38      | 0.760 | 0.232 | 0.735    | 0.785    | 0.140     | 0.523 | 0.782 | 1.000 | 1.000 |
|          |        | 35-44 | 374   | 39      | 0.704 | 0.246 | 0.677    | 0.730    | 0.038     | 0.506 | 0.761 | 1.000 | 1.000 |
|          |        | 45-54 | 315   | 34      | 0.687 | 0.267 | 0.656    | 0.718    | -0.073    | 0.475 | 0.761 | 1.000 | 1.000 |
|          |        | 55-64 | 143   | 15      | 0.695 | 0.270 | 0.648    | 0.742    | -0.023    | 0.506 | 0.746 | 1.000 | 1.000 |
| Housed   | Both   | 16-24 | 1400  | 157     | 0.929 | 0.137 | 0.922    | 0.937    | 0.151     | 1.000 | 1.000 | 1.000 | 1.000 |
|          |        | 25-34 | 3640  | 384     | 0.918 | 0.148 | 0.913    | 0.924    | -0.021    | 0.782 | 1.000 | 1.000 | 1.000 |
|          |        | 35-44 | 3740  | 367     | 0.887 | 0.176 | 0.881    | 0.893    | 0.038     | 0.761 | 1.000 | 1.000 | 1.000 |
|          |        | 45-54 | 3150  | 312     | 0.855 | 0.201 | 0.848    | 0.862    | -0.073    | 0.761 | 1.000 | 1.000 | 1.000 |
|          |        | 55-64 | 1430  | 133     | 0.814 | 0.226 | 0.802    | 0.827    | 0.029     | 0.698 | 0.782 | 1.000 | 1.000 |
| Homeless | Both   | All   | 1336  | 142     | 0.723 | 0.249 | 0.709    | 0.737    | -0.073    | 0.506 | 0.761 | 1.000 | 1.000 |
| Housed   | Both   | All   | 13360 | 1353    | 0.884 | 0.181 | 0.881    | 0.888    | -0.073    | 0.761 | 1.000 | 1.000 | 1.000 |

**5. Table S3: QALY scores, time trade-off method**

| Group    | Sex    | Age   | N     | Missing | Mean  |       |          |          | Quantiles |       |       |       |       |
|----------|--------|-------|-------|---------|-------|-------|----------|----------|-----------|-------|-------|-------|-------|
|          |        |       |       |         | Mean  | sd    | 0.025 CI | 0.975 CI | 0%        | 25%   | 50%   | 75%   | 100%  |
| Homeless | Female | 16-24 | 46    | 6       | 0.732 | 0.250 | 0.652    | 0.811    | 0.222     | 0.491 | 0.796 | 1.000 | 1.000 |
|          |        | 25-34 | 69    | 5       | 0.656 | 0.311 | 0.579    | 0.734    | -0.077    | 0.414 | 0.770 | 1.000 | 1.000 |
|          |        | 35-44 | 69    | 7       | 0.583 | 0.358 | 0.492    | 0.674    | -0.077    | 0.305 | 0.726 | 0.848 | 1.000 |
|          |        | 45-54 | 52    | 8       | 0.561 | 0.399 | 0.439    | 0.682    | -0.594    | 0.291 | 0.708 | 0.848 | 1.000 |
|          |        | 55-64 | 13    | 3       | 0.571 | 0.337 | 0.330    | 0.812    | 0.082     | 0.233 | 0.708 | 0.831 | 1.000 |
|          | Male   | 16-24 | 94    | 10      | 0.813 | 0.244 | 0.760    | 0.866    | 0.128     | 0.725 | 0.866 | 1.000 | 1.000 |
|          |        | 25-34 | 295   | 33      | 0.769 | 0.282 | 0.734    | 0.803    | -0.181    | 0.700 | 0.848 | 1.000 | 1.000 |
|          |        | 35-44 | 305   | 32      | 0.702 | 0.308 | 0.665    | 0.739    | -0.349    | 0.414 | 0.796 | 1.000 | 1.000 |
|          |        | 45-54 | 263   | 26      | 0.668 | 0.343 | 0.624    | 0.712    | -0.181    | 0.414 | 0.796 | 1.000 | 1.000 |
|          |        | 55-64 | 130   | 12      | 0.668 | 0.361 | 0.602    | 0.734    | -0.536    | 0.414 | 0.796 | 1.000 | 1.000 |
| Housed   | Female | 16-24 | 460   | 45      | 0.924 | 0.150 | 0.909    | 0.938    | -0.074    | 0.848 | 1.000 | 1.000 | 1.000 |
|          |        | 25-34 | 690   | 63      | 0.916 | 0.166 | 0.903    | 0.929    | -0.181    | 0.848 | 1.000 | 1.000 | 1.000 |
|          |        | 35-44 | 690   | 50      | 0.883 | 0.203 | 0.867    | 0.898    | -0.239    | 0.796 | 1.000 | 1.000 | 1.000 |
|          |        | 45-54 | 520   | 56      | 0.822 | 0.260 | 0.798    | 0.845    | -0.594    | 0.727 | 0.848 | 1.000 | 1.000 |
|          |        | 55-64 | 130   | 4       | 0.810 | 0.272 | 0.762    | 0.858    | -0.426    | 0.727 | 0.848 | 1.000 | 1.000 |
|          | Male   | 16-24 | 940   | 112     | 0.944 | 0.134 | 0.935    | 0.953    | -0.074    | 1.000 | 1.000 | 1.000 | 1.000 |
|          |        | 25-34 | 2950  | 321     | 0.928 | 0.153 | 0.922    | 0.934    | -0.484    | 0.848 | 1.000 | 1.000 | 1.000 |
|          |        | 35-44 | 3050  | 317     | 0.895 | 0.193 | 0.888    | 0.902    | -0.358    | 0.796 | 1.000 | 1.000 | 1.000 |
|          |        | 45-54 | 2630  | 256     | 0.865 | 0.226 | 0.856    | 0.874    | -0.594    | 0.796 | 1.000 | 1.000 | 1.000 |
|          |        | 55-64 | 1300  | 129     | 0.814 | 0.268 | 0.798    | 0.829    | -0.239    | 0.727 | 0.850 | 1.000 | 1.000 |
| Homeless | Female | All   | 249   | 29      | 0.626 | 0.338 | 0.581    | 0.671    | -0.594    | 0.414 | 0.727 | 0.848 | 1.000 |
|          | Male   | All   | 1087  | 113     | 0.717 | 0.316 | 0.697    | 0.737    | -0.536    | 0.414 | 0.848 | 1.000 | 1.000 |
| Housed   | Female | All   | 2490  | 218     | 0.883 | 0.207 | 0.874    | 0.891    | -0.594    | 0.796 | 1.000 | 1.000 | 1.000 |
|          | Male   | All   | 10870 | 1135    | 0.891 | 0.202 | 0.887    | 0.895    | -0.594    | 0.796 | 1.000 | 1.000 | 1.000 |
| Homeless | Both   | 16-24 | 140   | 16      | 0.786 | 0.248 | 0.742    | 0.831    | 0.128     | 0.721 | 0.848 | 1.000 | 1.000 |
|          |        | 25-34 | 364   | 38      | 0.747 | 0.291 | 0.715    | 0.778    | -0.181    | 0.533 | 0.848 | 1.000 | 1.000 |
|          |        | 35-44 | 374   | 39      | 0.680 | 0.321 | 0.645    | 0.714    | -0.349    | 0.414 | 0.796 | 1.000 | 1.000 |
|          |        | 45-54 | 315   | 34      | 0.651 | 0.354 | 0.610    | 0.693    | -0.594    | 0.378 | 0.796 | 1.000 | 1.000 |
|          |        | 55-64 | 143   | 15      | 0.660 | 0.359 | 0.597    | 0.723    | -0.536    | 0.414 | 0.788 | 1.000 | 1.000 |
| Housed   | Both   | 16-24 | 1400  | 157     | 0.937 | 0.140 | 0.930    | 0.945    | -0.074    | 1.000 | 1.000 | 1.000 | 1.000 |
|          |        | 25-34 | 3640  | 384     | 0.926 | 0.155 | 0.920    | 0.931    | -0.484    | 0.848 | 1.000 | 1.000 | 1.000 |
|          |        | 35-44 | 3740  | 367     | 0.893 | 0.195 | 0.886    | 0.899    | -0.358    | 0.796 | 1.000 | 1.000 | 1.000 |
|          |        | 45-54 | 3150  | 312     | 0.858 | 0.232 | 0.849    | 0.867    | -0.594    | 0.796 | 1.000 | 1.000 | 1.000 |
|          |        | 55-64 | 1430  | 133     | 0.813 | 0.269 | 0.799    | 0.828    | -0.426    | 0.727 | 0.850 | 1.000 | 1.000 |
| Homeless | Both   | All   | 1336  | 142     | 0.700 | 0.322 | 0.682    | 0.719    | -0.594    | 0.414 | 0.812 | 1.000 | 1.000 |
| Housed   | Both   | All   | 13360 | 1353    | 0.890 | 0.203 | 0.886    | 0.893    | -0.594    | 0.796 | 1.000 | 1.000 | 1.000 |
